# Supplementary material
Source: publisher figshare collection journal article supplement (https://acs.figshare.com/ndownloader/files/5201002)
Supplement: Supplementary file 1 [file 5201002]

# On The Performance of the RB3-LYP, RMP2 and UCCSD(T) Procedures in Calculating Radical Stabilization Energies for •NHX Radicals

Geoffrey P. F. Wood, David J. Henry, and Leo Radom

*Research School of Chemistry, Australian National University, Canberra, ACT 0200, Australia, and School of Chemistry, University of Sydney, Sydney, NSW 2006, Australia*

## SUPPORTING INFORMATION (One Page)

**TABLE S1: Total Energies (Hartrees, Without ZPVEs) for the Ground States (A" or pseudo-A") of •NHX Radicals Calculated at Various Levels of Theory with the 6-31+G(d) Basis Set on UB3-LYP/6-31+G(d) Geometries**

| Level     | •NH <sub>2</sub> | •NHCF <sub>3</sub> | •NHCHO      | •NHCOCH <sub>3</sub> | •NHCONH <sub>2</sub> |
|-----------|------------------|--------------------|-------------|----------------------|----------------------|
| UHF       | −55.56010        | −391.19280         | −168.29900  | −207.34311           | −223.35585           |
| RHF       | −55.55576        | −391.18826         | −168.28303  | −207.33242           | −223.35019           |
| UB3-LYP   | −55.87887        | −392.94124         | −169.215762 | −208.54429           | −224.60161           |
| RB3-LYP   | −55.87732        | −392.93967         | −169.21230  | −208.54136           | −224.59951           |
| UMP2      | −55.69658        | −391.97390         | −168.71486  | −207.89827           | −223.95632           |
| RMP2      | −55.69661        | −391.97409         | −168.72910  | −207.90846           | −223.95715           |
| UCCSD(T)  | −55.71771        | −392.01398         | −168.76796  | −207.96341           | −224.00392           |
| URCCSD(T) | −55.71771        | −392.01397         | −168.76823  | −207.96242           | −224.00396           |
